# Supplementary material for: Anti-Tumor Effects of MAPK-Dependent Tumor-Selective Oncolytic Vaccinia Virus Armed with CD/UPRT against Pancreatic Ductal Adenocarcinoma in Mice
Source: MDPI journal article supplement (doi:10.3390/cells10050985), 2021-04-23
Supplement: s1 [file s1]

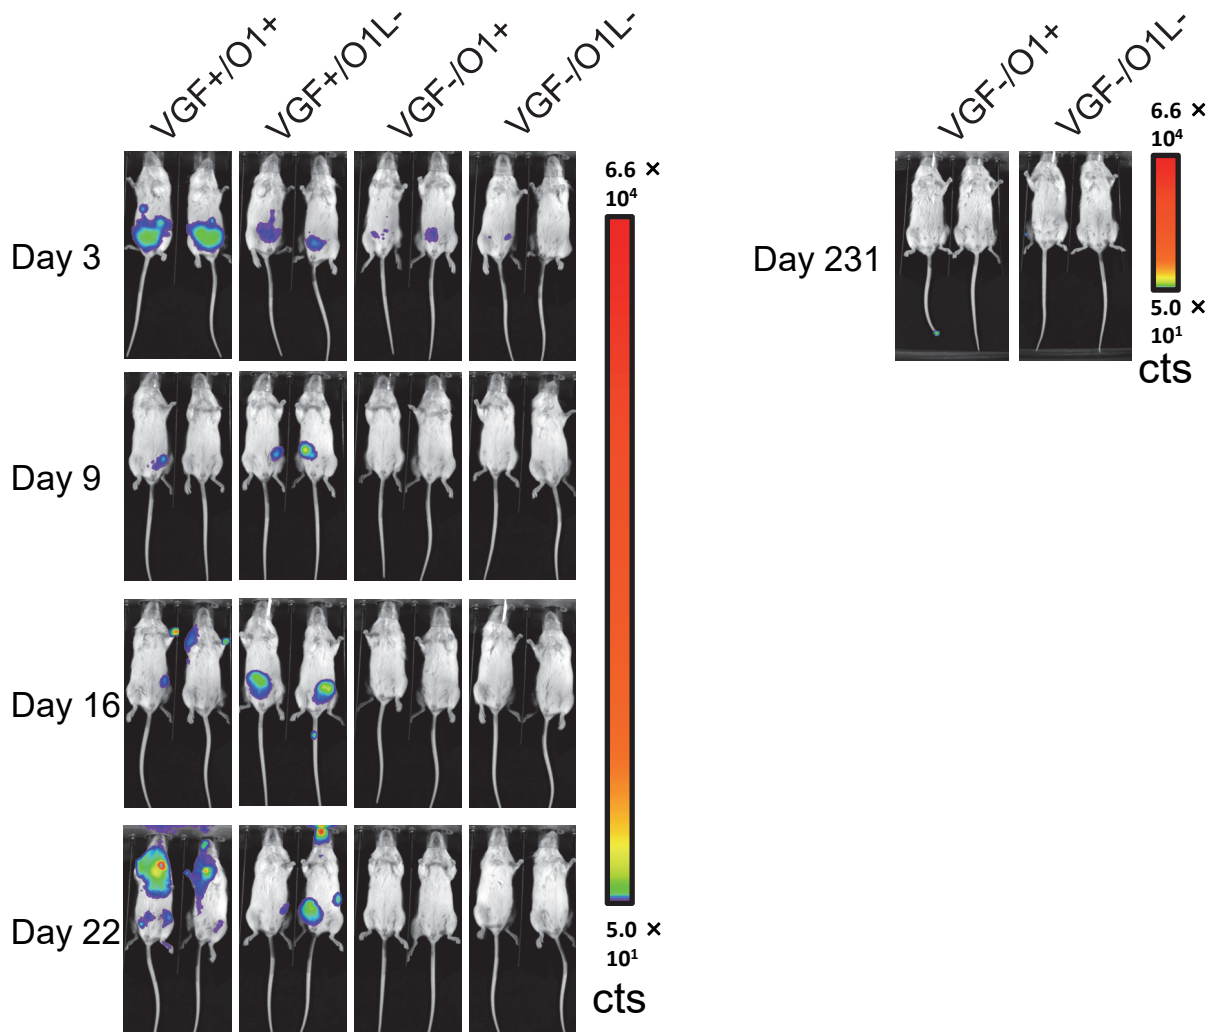

**Figure S1.** Viral distribution in SCID mice of Figure 2D. SCID mice were injected intraperitoneally with  $1 \times 10^6$  plaque-forming units (PFUs) of each recombinant virus (n=2). Viral replication was non-invasively detected by firefly luciferase (Fluc) luminescence following the I.P. injections of 200  $\mu$ L VivoGlo Luciferin, In Vivo Grade (3 mg/mouse; Promega, Madison, WI, USA) on days 3, 9, 16, 22, and 231 after viral injection.

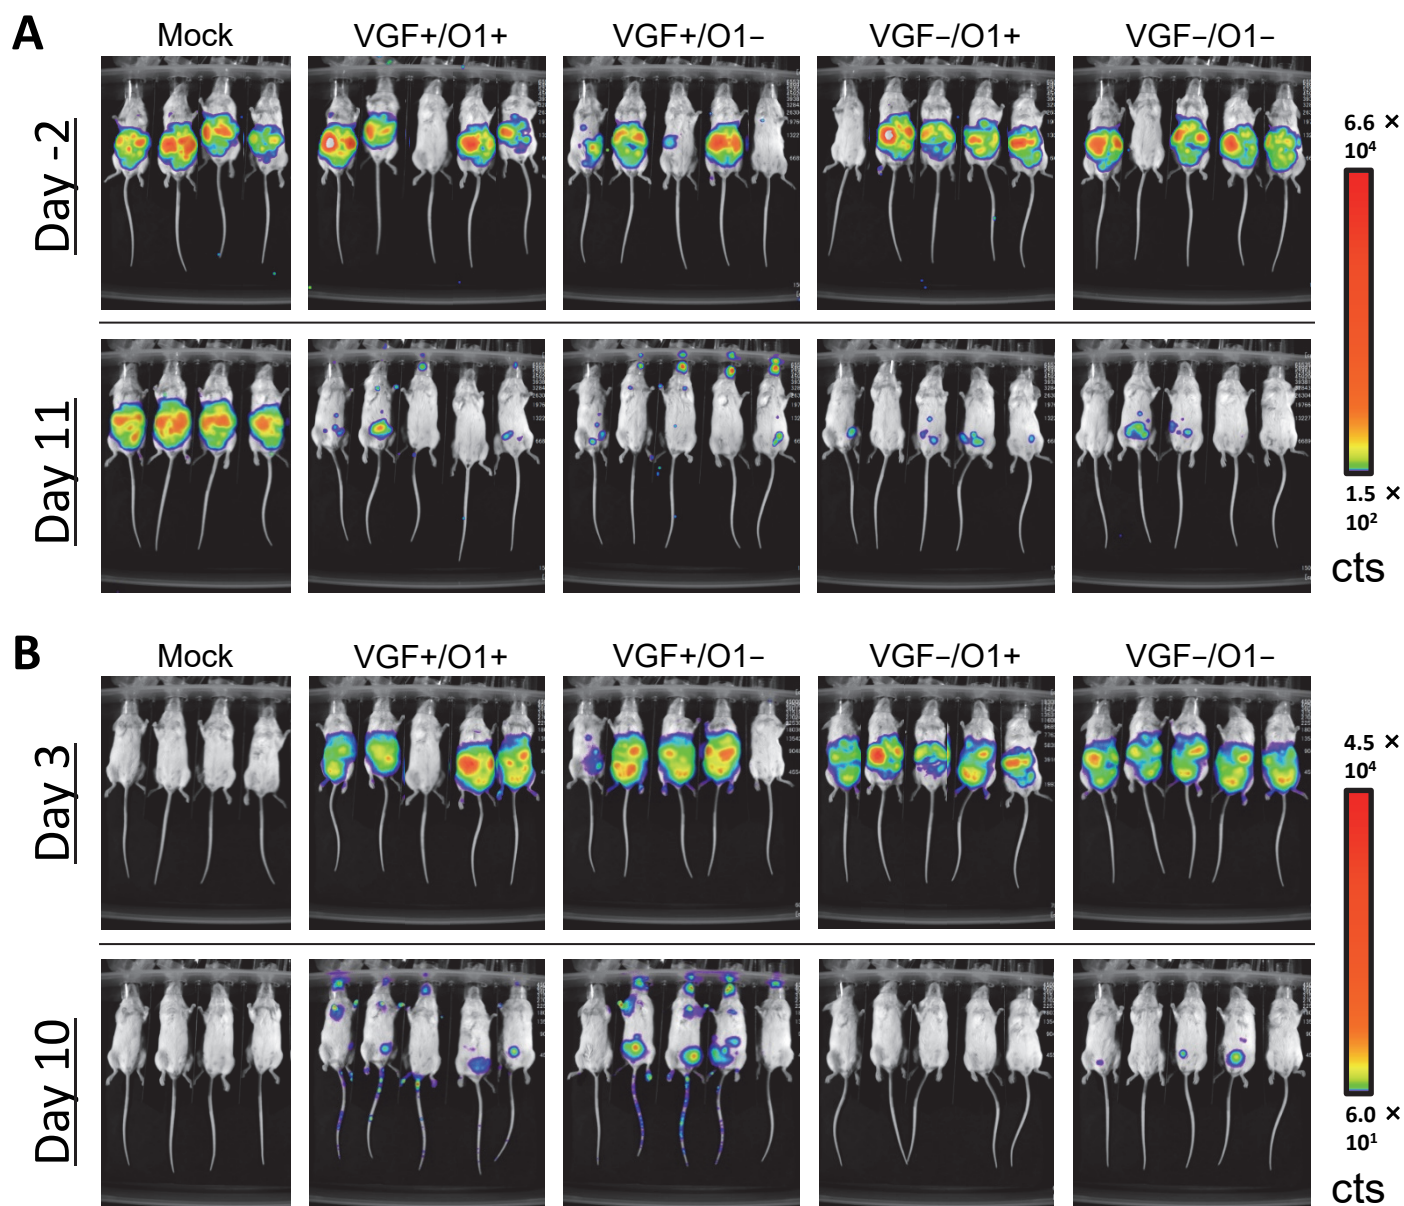

**Figure S2.** Tumor growth and viral distribution in SCID mice bearing peritoneally disseminated BxPC-3 xenografts of Figure 2E. **(A)** BxPC-3 cells stably expressing Renilla luciferase ( $5 \times 10^6$  cells) were injected intraperitoneally into SCID mice. Eight days after tumor transplantation, the mice received a single intraperitoneal injection of each recombinant virus ( $1 \times 10^6$  PFU). Tumor growth was non-invasively visualized by Renilla luciferase (Rluc) luminescence following the I.P. injections of 150  $\mu$ L of ViviRen In Vivo Renilla Luciferase Substrate (18.5  $\mu$ g/mouse; Promega, Madison, WI, USA) 2 day before and 11 days after viral administration. **(B)** Viral replication was non-invasively detected on days 3 and 10 after viral treatment via Fluc luminescence following the I.P. injections of 200  $\mu$ L VivoGlo Luciferin, In Vivo Grade (3 mg/mouse).

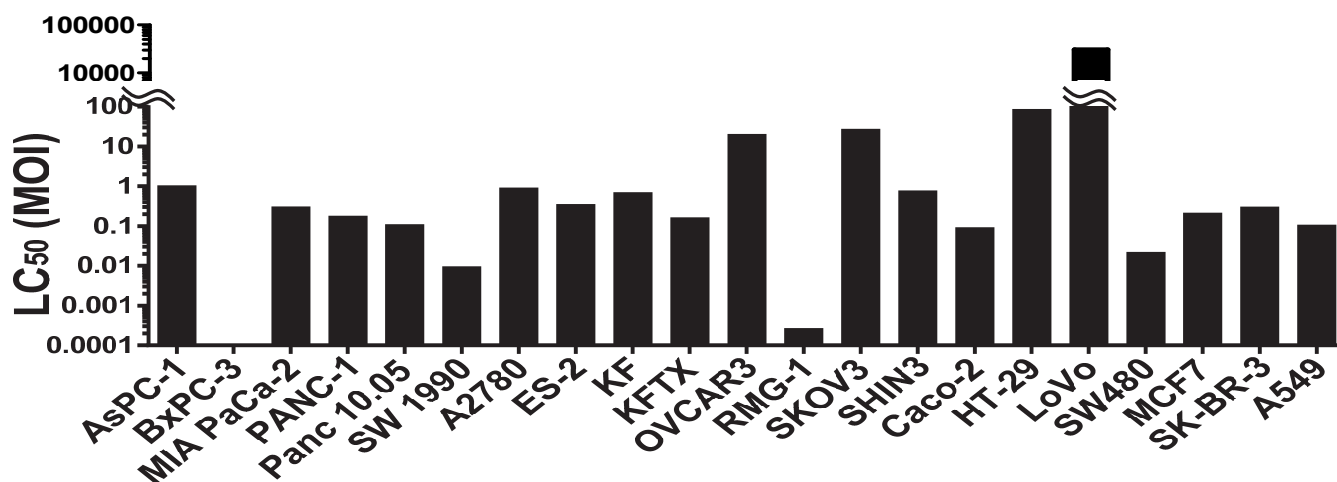

**Figure S3.** Evaluation of viral LC<sub>50</sub> with various types of tumor cell lines. Various types of tumor cell lines were infected with mitogen-activated protein kinase (MAPK)-dependent recombinant vaccinia virus (MDRVV; LG-DsRed) at a multiplicity of infection (MOI) of 0, 0.01, 0.1, or 1, and then, 120 h later, cell viability was measured using the CellTiter 96 Aqueous Nonradioactive Cell Proliferation Assay (Promega, Madison, WI, USA). LC<sub>50</sub> values were calculated from calibration curves of the viability reduction ratio versus virus concentration.

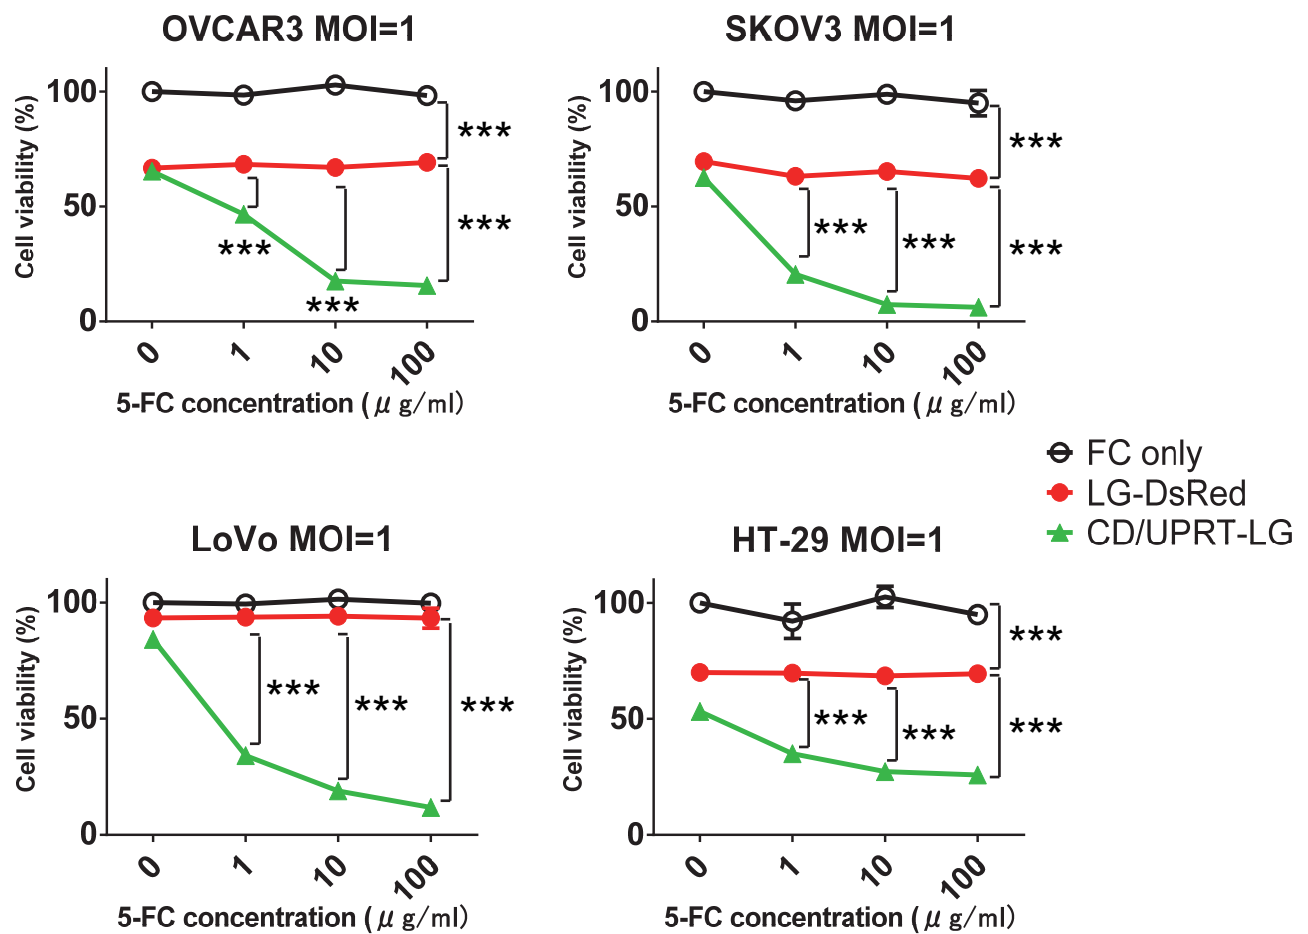

**Figure S4.** In vitro viral oncolytic effect and prodrug combination in other cancer cell lines. The combined effect of two recombinant viruses (MOI of 1) and 5-FC in other human cancer cell lines (having higher viral  $LC_{50}$  values) as described in Figure S3. The data are presented as the mean  $\pm$  SD ( $n = 3$ ). \*\*\* $P < 0.001$  (two-tailed unpaired t-test).

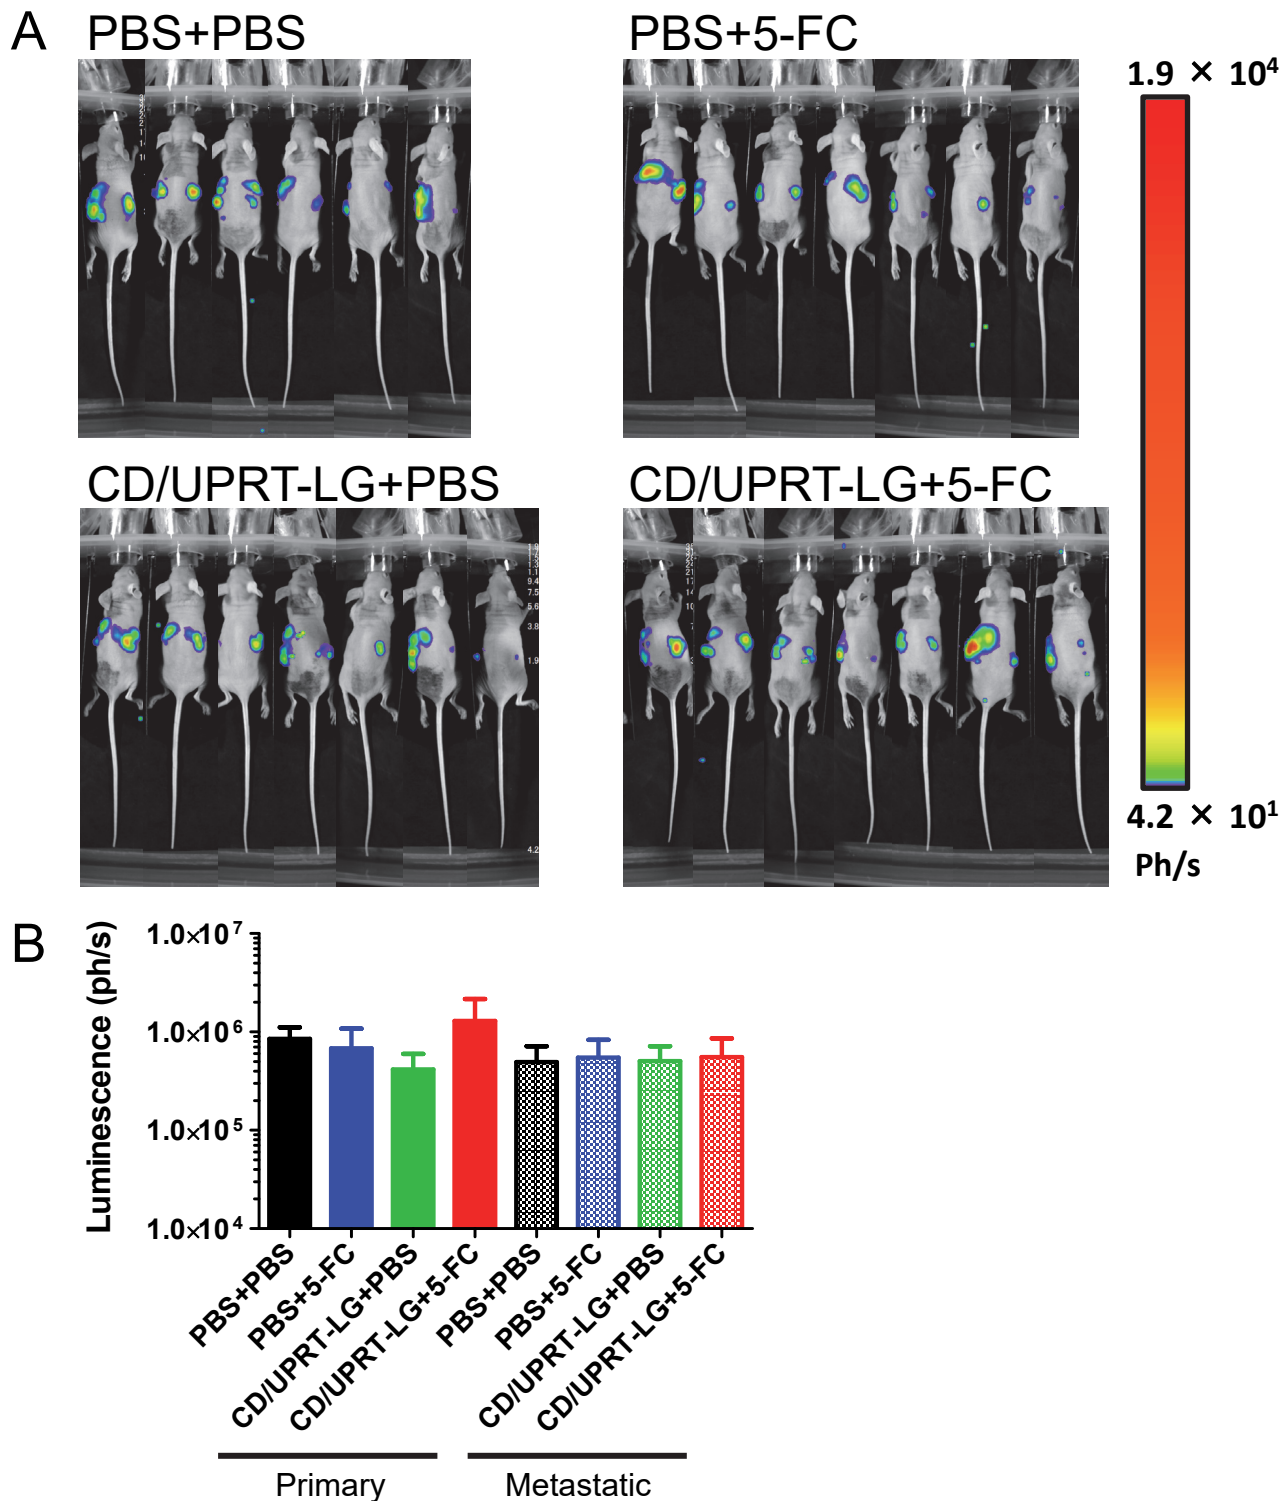

**Figure S5.** Tumor growth before viral treatment in the clinically relevant mouse tumor model of Figure 6. **(A)** Tumor growth in primary spleens and liver metastasis was non-invasively detected via Rluc luminescence following the I.P. injections of 150  $\mu$ L of ViviRen In Vivo Renilla Luciferase Substrate (18.5  $\mu$ g/mouse) on day 1 before viral treatment. **(B)** Quantification of tumor Rluc luminescence was determined from (A). The data are presented as the mean + SD (n = 6–7).



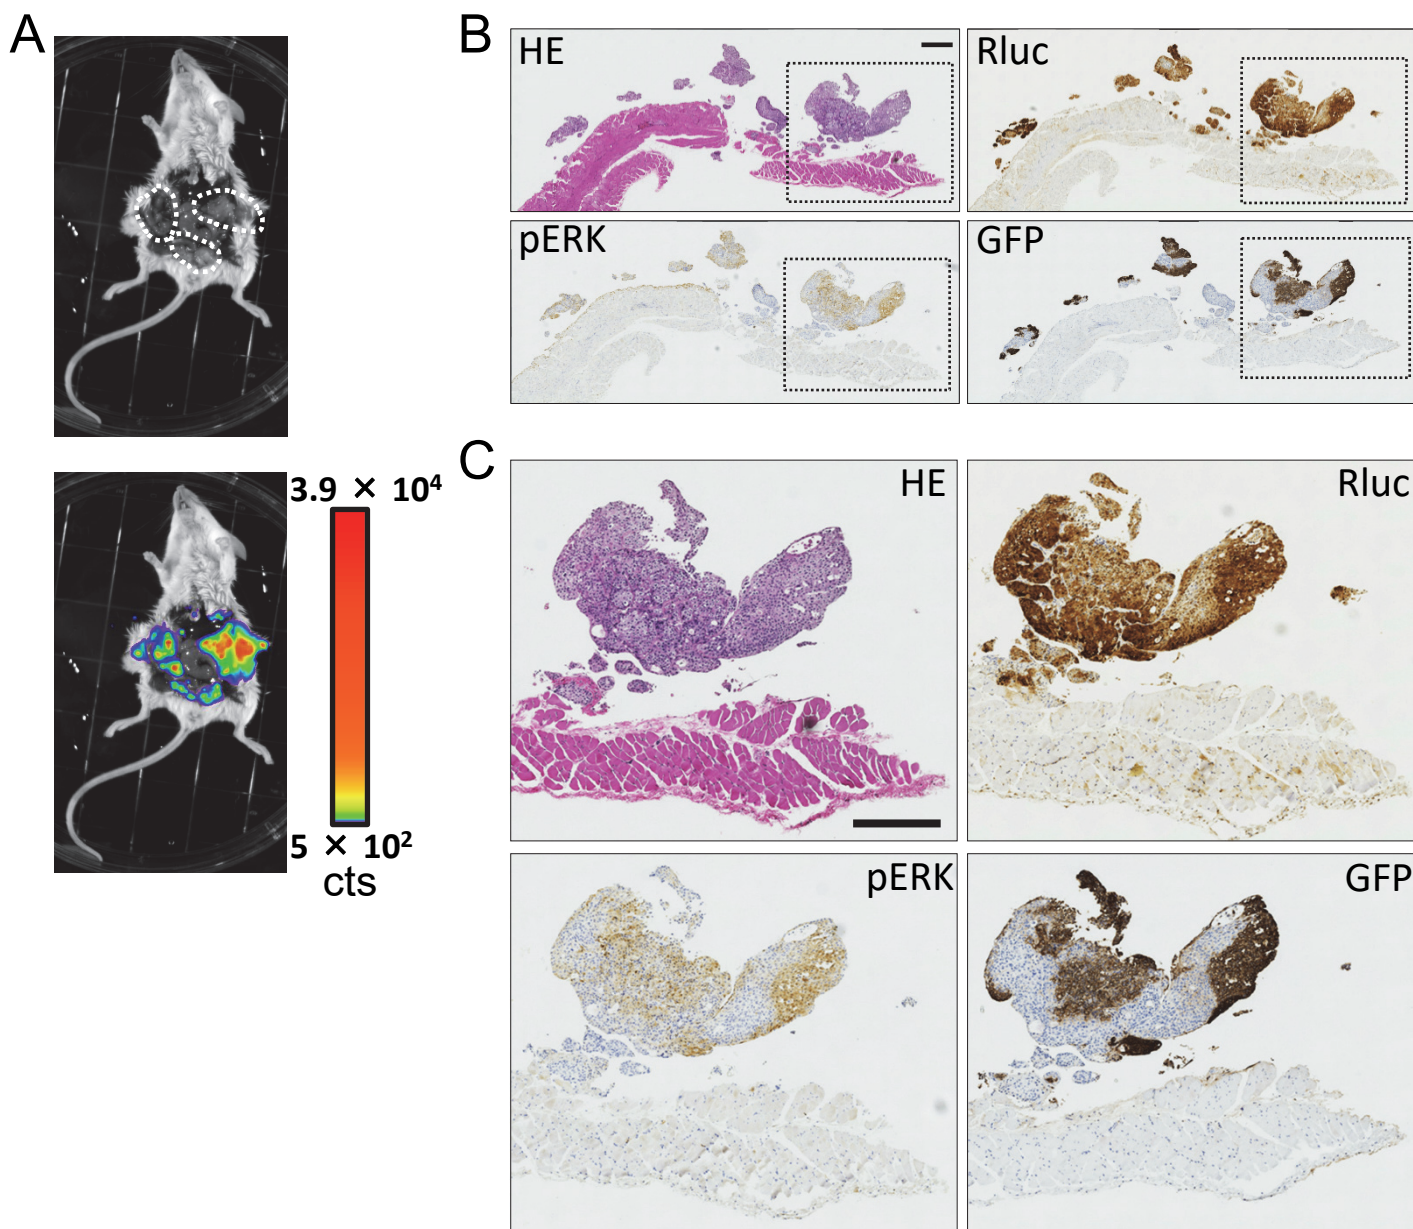

**Figure S6.** Relationship between in vivo pERK expression and viral replication of MDRVV. (A) BxPC-3 cells stably expressing Renilla luciferase ( $5 \times 10^6$  cells) were injected intraperitoneally into SCID mice. Thirty-three days after tumor transplantation, the mice received a single intraperitoneal injection of LG-DsRed virus ( $1 \times 10^6$  PFU). Three days later, the treated mouse was injected intraperitoneally with 200  $\mu$ L VivoGlo Luciferin, In Vivo Grade (3 mg/mouse), and was sacrificed 15 min after the injection. Immediately, intraperitoneal bright-field (top) and Fluc luminescence (bottom) images were taken with NightSHADE LB985 (Berthold Technologies, Bad Wildbad, Germany). Dotted circles show the tumor sites. (B) Subsequently, the tissues were formalin-fixed and paraffin-embedded, sliced and stained with hematoxylin and eosin, an anti-GFP antibody (CST, Tokyo, Japan), an anti-phosphorylated p44/42 MAPK protein (Erk1/2) antibody (CST, Tokyo, Japan), or anti-Rluc antibody (MBL, Nagoya, Japan). Scale bar, 300  $\mu$ m. (C) Extended images of those marked with squares in (B). Scale bar, 300  $\mu$ m.
